# Supplementary material for: Volatile Composition of Sparkling Wines of cv. Chardonnay Cultivated under Different Training Systems in Serra da Mantiqueira (Brazil)
Source: MDPI journal article supplement (doi:10.3390/foods11111529), 2022-05-24
Supplement: s1 [file s1]

## Supplementary material:

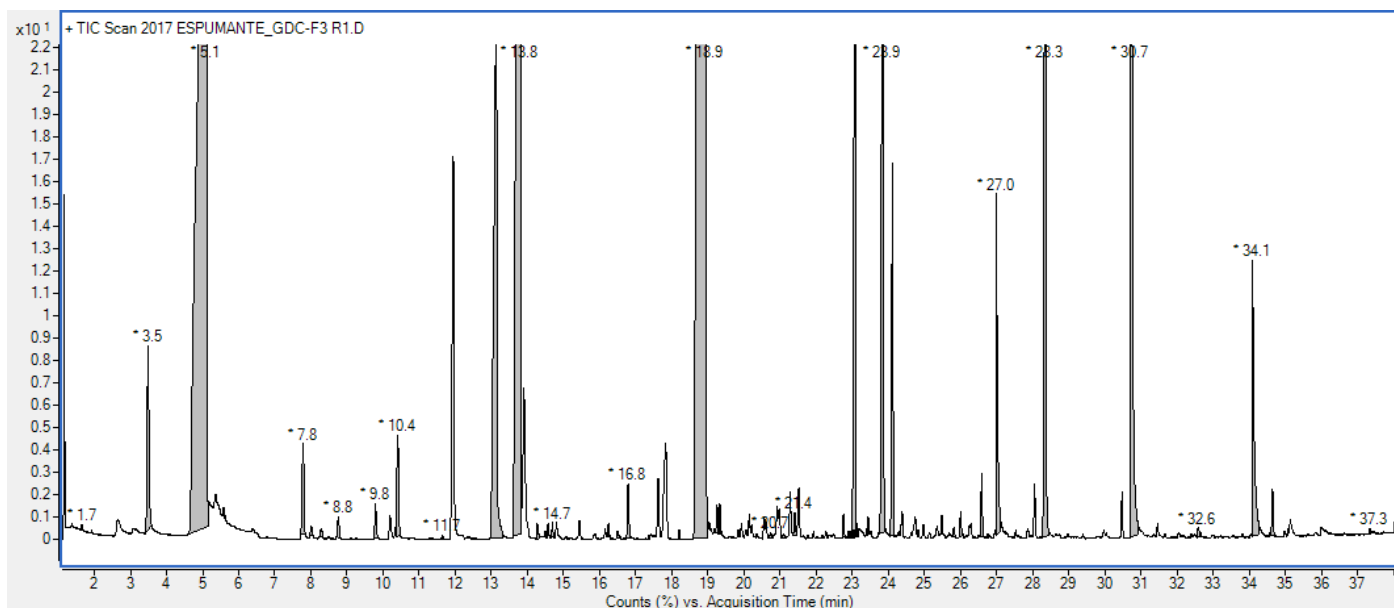

**Figure S1.** Expanded sample chromatogram with the main volatile compounds identified for the GDC system.

**Table S1.** Normalised areas of the volatile compounds (area of the compound/area of the internal standard) for the GDC training system in the summer vintage of 2017 in Caldas – MG (Brazil) in replicate bottles and vinifications.

| GDC 2017 |                         |    | Vinification 1 |        |        | Vinification 2 |        |        | Vinification 3 |        |        |
|----------|-------------------------|----|----------------|--------|--------|----------------|--------|--------|----------------|--------|--------|
| Class    | Compound                | ID | B1             | B2     | B3     | B1             | B2     | B3     | B1             | B2     | B3     |
| Acids    | Acetic acid             | 16 | 0.0087         | 0.0179 | 0.0188 | 0.0112         | 0.0219 | 0.0229 | 0.0206         | 0.0261 | 0.0260 |
|          | Butanoic acid           | 22 | 0.0070         | 0.0075 | 0.0071 | 0.0033         | 0.0055 | 0.0046 | 0.0083         | 0.0103 | 0.0074 |
|          | Dodecanoic acid         | 28 | 0.0059         | 0.0028 | 0.0040 | 0.0083         | 0.0000 | 0.0026 | 0.0134         | 0.0031 | 0.0052 |
|          | Hexanoic acid           | 35 | 0.4727         | 0.3857 | 0.3868 | 0.5187         | 0.4049 | 0.3820 | 0.6241         | 0.5820 | 0.4219 |
|          | Decanoic acid           | 40 | 0.5332         | 0.2527 | 0.4633 | 0.5450         | 0.2711 | 0.2700 | 0.6108         | 0.3047 | 0.3893 |
|          | Nonanoic acid           | 42 | 0.0372         | 0.0056 | 0.0110 | 0.0265         | 0.0093 | 0.0078 | 0.0277         | 0.0053 | 0.0092 |
|          | Octanoic acid           | 43 | 2.3384         | 1.6455 | 2.0263 | 2.5766         | 1.8770 | 1.6182 | 2.7376         | 2.1031 | 1.8687 |
| Alcohols | 3-Methyl-1-butanol      | 1  | 1.9028         | 1.6400 | 1.7379 | 1.9083         | 1.7594 | 1.6095 | 1.7533         | 1.8438 | 1.9140 |
|          | Decanol                 | 3  | 0.0431         | 0.0111 | 0.0155 | 0.0431         | 0.0155 | 0.0419 | 0.0413         | 0.0125 | 0.0475 |
|          | Hexanol                 | 4  | 0.1226         | 0.1141 | 0.1101 | 0.1356         | 0.1147 | 0.1142 | 0.1154         | 0.1027 | 0.0910 |
|          | Nonanol                 | 5  | 0.0125         | 0.0071 | 0.0096 | 0.0109         | 0.0069 | 0.0116 | 0.0105         | 0.0059 | 0.0108 |
|          | Octanol                 | 6  | 0.0406         | 0.0350 | 0.0394 | 0.0439         | 0.0334 | 0.0333 | 0.0496         | 0.0346 | 0.0342 |
|          | Propanol                | 7  | 0.0279         | 0.0300 | 0.0302 | 0.0296         | 0.0271 | 0.0302 | 0.0301         | 0.0366 | 0.0343 |
|          | 2-Methyl-1-propanol     | 8  | 0.0795         | 0.0822 | 0.0848 | 0.0811         | 0.0645 | 0.0728 | 0.0790         | 0.0824 | 0.0746 |
|          | 3-Hexen-1-ol, (E)-      | 14 | 0.0024         | 0.0019 | 0.0021 | 0.0024         | 0.0018 | 0.0017 | 0.0025         | 0.0022 | 0.0015 |
| Aldehyde | Phenylethyl alcohol     | 49 | 2.1450         | 1.6559 | 1.7861 | 2.6425         | 1.9627 | 1.8849 | 2.0095         | 1.8651 | 1.3848 |
|          | Acetaldehyde            | 15 | 0.0063         | 0.0055 | 0.0064 | 0.0094         | 0.0062 | 0.0079 | 0.0075         | 0.0092 | 0.0061 |
|          | Benzaldehyde            | 19 | 0.0080         | 0.0087 | 0.0062 | 0.0090         | 0.0059 | 0.0074 | 0.0106         | 0.0130 | 0.0069 |
| Esters   | Furfural                | 32 | 0.0649         | 0.516  | 0.0566 | 0.0706         | 0.0614 | 0.0591 | 0.0559         | 0.0617 | 0.0568 |
|          | Ethyl (E)-crotonate     | 10 | 0.0056         | 0.0044 | 0.0041 | 0.0065         | 0.0035 | 0.0032 | 0.0083         | 0.0023 | 0.0055 |
|          | 2-Ethylhexyl salicylate | 11 | 0.0497         | 0.0016 | 0.0032 | 0.0568         | 0.0022 | 0.0023 | 0.0917         | 0.0019 | 0.0038 |
|          | Ethyl furoate           | 12 | 0.0449         | 0.0347 | 0.0342 | 0.0516         | 0.0311 | 0.0319 | 0.0426         | 0.0327 | 0.0321 |
|          | Ethyl 2-hexenoate       | 13 | 0.0106         | 0.0042 | 0.0041 | 0.0074         | 0.0069 | 0.0110 | 0.0073         | 0.0000 | 0.0000 |
|          | Ethyl phenylacetate     | 20 | 0.0478         | 0.0431 | 0.0440 | 0.0559         | 0.0437 | 0.0408 | 0.0465         | 0.0296 | 0.0315 |
|          | Diethyl succinate       | 21 | 2.6070         | 2.3962 | 2.5393 | 3.2614         | 2.5555 | 2.5524 | 2.3344         | 2.5264 | 1.8489 |
|          | Ethyl 2-methylbutyrate  | 23 | 0.0432         | 0.0474 | 0.0478 | 0.0487         | 0.0468 | 0.0433 | 0.0262         | 0.0031 | 0.0289 |

|                |                                  |    |         |         |         |         |         |         |         |         |         |
|----------------|----------------------------------|----|---------|---------|---------|---------|---------|---------|---------|---------|---------|
|                | Ethyl isovalerate                | 24 | 0.0617  | 0.0642  | 0.0665  | 0.0650  | 0.0642  | 0.0597  | 0.0520  | 0.0071  | 0.0545  |
|                | Ethyl butanoate                  | 25 | 0.2240  | 0.2078  | 0.2104  | 0.2279  | 0.2022  | 0.1915  | 0.2498  | 0.0689  | 0.2394  |
|                | Ethyl decanoate                  | 26 | 1.4272  | 1.0268  | 1.1623  | 1.5649  | 0.8137  | 0.7929  | 1.7057  | 1.5591  | 1.4124  |
|                | Ethyl 9-decenoate                | 30 | 0.7623  | 0.6446  | 0.7517  | 0.9100  | 0.6036  | 0.5845  | 0.7132  | 0.1415  | 0.5943  |
|                | Ethyl heptanoate                 | 34 | 0.0274  | 0.0269  | 0.0271  | 0.0382  | 0.0525  | 0.0295  | 0.0316  | 0.0051  | 0.0291  |
|                | Isobutyl hexanoate               | 36 | 0.0018  | 0.0024  | 0.0027  | 0.0025  | 0.0031  | 0.0024  | 0.0029  | 0.0000  | 0.0033  |
|                | Ethyl hexanoate                  | 37 | 4.6643  | 4.2583  | 4.3180  | 5.0140  | 4.0265  | 3.8205  | 6.2573  | 5.7173  | 5.1772  |
|                | Methyl hexanoate                 | 38 | 0.0031  | 0.0027  | 0.0027  | 0.0038  | 0.0000  | 0.0000  | 0.0043  | 0.0000  | 0.0000  |
|                | Isopentyl hexanoate              | 39 | 0.0363  | 0.0313  | 0.0310  | 0.0447  | 0.0424  | 0.0382  | 0.0476  | 0.0140  | 0.0415  |
|                | Isoamyl octanoate                | 44 | 0.0372  | 0.0305  | 0.0285  | 0.0428  | 0.0206  | 0.0269  | 0.0457  | 0.0000  | 0.0355  |
|                | Ethyl octanoate                  | 45 | 14.6251 | 12.3989 | 13.0691 | 16.4038 | 11.3192 | 11.0516 | 19.2129 | 17.4126 | 15.6122 |
|                | Diethyl glutarate                | 46 | 0.0141  | 0.0103  | 0.0118  | 0.0175  | 0.0116  | 0.0101  | 0.0165  | 0.0137  | 0.0103  |
|                | Ethyl 2-hydroxy-4-methylvalerate | 47 | 0.0084  | 0.0101  | 0.0103  | 0.0089  | 0.0087  | 0.0067  | 0.0089  | 0.0120  | 0.0080  |
|                | Ethyl valerate                   | 48 | 0.0040  | 0.0029  | 0.0049  | 0.0024  | 0.0044  | 0.0032  | 0.0023  | 0.0000  | 0.0028  |
|                | Ethyl lactate                    | 50 | 0.0171  | 0.0208  | 0.0195  | 0.0242  | 0.0180  | 0.0138  | 0.0152  | 0.0212  | 0.0195  |
|                | Ethyl isobutyrate                | 51 | 0.0362  | 0.0330  | 0.0373  | 0.0303  | 0.0199  | 0.0305  | 0.0264  | 0.0119  | 0.0216  |
|                | Isoamyl acetate                  | 2  | 0.1762  | 0.1384  | 0.1297  | 0.1739  | 0.1191  | 0.1075  | 0.2853  | 0.0266  | 0.1743  |
|                | Phenethyl acetate                | 17 | 0.0826  | 0.0632  | 0.0597  | 0.0813  | 0.0606  | 0.0498  | 0.1158  | 0.0694  | 0.0715  |
|                | Hexyl acetate                    | 18 | 0.0201  | 0.0115  | 0.0103  | 0.0160  | 0.0171  | 0.0091  | 0.0283  | 0.0000  | 0.0179  |
|                | Ethyl acetate                    | 31 | 0.4392  | 0.4186  | 0.4234  | 0.4445  | 0.3923  | 0.3973  | 0.5202  | 0.3849  | 0.5085  |
| <b>Ether</b>   | 3-Ethoxypropanol                 | 9  | 0.0033  | 0.0033  | 0.0037  | 0.0042  | 0.0026  | 0.0025  | 0.0065  | 0.0046  | 0.0040  |
| <b>H</b>       | Styrene                          | 53 | 0.0242  | 0.0209  | 0.0226  | 0.0348  | 0.0242  | 0.0171  | 0.0334  | 0.0089  | 0.0306  |
| <b>C13-NP</b>  | $\beta$ -Damascenone             | 52 | 0.0115  | 0.0121  | 0.0121  | 0.0224  | 0.0090  | 0.0066  | 0.0052  | 0.0090  | 0.0126  |
| <b>Phenol</b>  | Hexyl salicylate                 | 41 | 0.0000  | 0.0016  | 0.0015  | 0.0000  | 0.0023  | 0.0015  | 0.0000  | 0.0000  | 0.0017  |
| <b>Sulfide</b> | Dimethyl sulfide                 | 27 | 0.0035  | 0.0016  | 0.0012  | 0.0037  | 0.0010  | 0.0010  | 0.0051  | 0.0009  | 0.0014  |
| <b>T</b>       | Geranylacetone                   | 33 | 0.0253  | 0.0129  | 0.0324  | 0.0174  | 0.0567  | 0.0472  | 0.0000  | 0.0239  | 0.0441  |
|                | $\alpha$ -Terpineol              | 54 | 0.0000  | 0.0072  | 0.0059  | 0.0000  | 0.0048  | 0.0018  | 0.0000  | 0.0061  | 0.0034  |
| <b>EtOH</b>    | Ethanol                          | 29 | 9.2551  | 9.0079  | 9.1884  | 9.5155  | 8.9934  | 9.0283  | 9.4441  | 9.5748  | 10.4312 |

ID: compounds identification; B: bottle; H: hydrocarbon; C13-NP: C13-norisoprenoid; T: terpenoid; EtOH: ethanol

**Table S2.** Normalised areas of the volatile compounds (area of the compound/area of the internal standard) for the GDC training system in the summer vintage of 2018 in Caldas – MG (Brazil) in replicate bottles and vinifications.

| GDC 2018 |                                  |    | Vinification 1 |         |         | Vinification 2 |         |         | Vinification 3 |         |         |
|----------|----------------------------------|----|----------------|---------|---------|----------------|---------|---------|----------------|---------|---------|
| Class    | Compound                         | ID | B1             | B2      | B3      | B1             | B2      | B3      | B1             | B2      | B3      |
| Acids    | Acetic acid                      | 16 | 0.0366         | 0.0240  | 0.0323  | 0.0296         | 0.0241  | 0.0215  | 0.0376         | 0.0226  | 0.0317  |
|          | Butanoic acid                    | 22 | 0.0135         | 0.0155  | 0.0143  | 0.0127         | 0.0133  | 0.0131  | 0.0140         | 0.0154  | 0.0149  |
|          | Dodecanoic acid                  | 28 | 0.0120         | 0.0093  | 0.0187  | 0.0101         | 0.0030  | 0.0068  | 0.0034         | 0.0057  | 0.0022  |
|          | Hexanoic acid                    | 35 | 0.4521         | 0.5102  | 0.6016  | 0.5036         | 0.4688  | 0.4997  | 0.4838         | 0.5551  | 0.5271  |
|          | Decanoic acid                    | 40 | 0.6095         | 0.4826  | 0.5319  | 0.8093         | 0.3195  | 0.6186  | 0.3501         | 0.5872  | 0.4994  |
|          | Nonanoic acid                    | 42 | 0.0419         | 0.0577  | 0.0708  | 0.0101         | 0.0046  | 0.0081  | 0.0053         | 0.0073  | 0.0067  |
|          | Octanoic acid                    | 43 | 2.3347         | 2.2474  | 2.7820  | 2.8193         | 2.1047  | 2.4049  | 2.2758         | 2.5282  | 2.6611  |
| Alcohols | 3-Methyl-1-butanol               | 1  | 2.1042         | 2.1676  | 2.1453  | 2.1264         | 2.1443  | 1.9745  | 2.1988         | 2.1211  | 2.1121  |
|          | Decanol                          | 3  | 0.0332         | 0.0324  | 0.0353  | 0.0417         | 0.0226  | 0.0390  | 0.0282         | 0.0417  | 0.0372  |
|          | Hexanol                          | 4  | 0.0955         | 0.1015  | 0.1176  | 0.0983         | 0.1046  | 0.0998  | 0.1020         | 0.1065  | 0.1024  |
|          | Nonanol                          | 5  | 0.0072         | 0.0086  | 0.0061  | 0.0091         | 0.0059  | 0.0107  | 0.0103         | 0.0104  | 0.0126  |
|          | Octanol                          | 6  | 0.0293         | 0.0358  | 0.0384  | 0.0355         | 0.0380  | 0.0398  | 0.0267         | 0.0365  | 0.0294  |
|          | Propanol                         | 7  | 0.0275         | 0.0292  | 0.0261  | 0.0288         | 0.0315  | 0.0293  | 0.0277         | 0.0280  | 0.0261  |
|          | 2-Methyl-1-propanol              | 8  | 0.0785         | 0.0655  | 0.0000  | 0.0781         | 0.0892  | 0.0790  | 0.0911         | 0.0808  | 0.0804  |
|          | 3-Hexen-1-ol, (E)-               | 14 | 0.0016         | 0.0021  | 0.0035  | 0.0021         | 0.0024  | 0.0021  | 0.0021         | 0.0018  | 0.0022  |
| Aldehyde | Phenylethyl alcohol              | 49 | 1.2426         | 1.3824  | 1.6570  | 1.5962         | 1.3076  | 1.4619  | 1.5119         | 1.6808  | 1.6754  |
|          | Acetaldehyde                     | 15 | 0.0062         | 0.0111  | 0.0050  | 0.0066         | 0.0051  | 0.0041  | 0.0043         | 0.0054  | 0.0099  |
|          | Benzaldehyde                     | 19 | 0.0063         | 0.0090  | 0.0050  | 0.0052         | 0.0063  | 0.0038  | 0.0058         | 0.0068  | 0.0077  |
|          | Furfural                         | 32 | 0.0290         | 0.0524  | 0.0399  | 0.0270         | 0.0335  | 0.0255  | 0.0308         | 0.0287  | 0.0501  |
| Esters   | Ethyl (E)-crotonate              | 10 | 0.0096         | 0.0088  | 0.0131  | 0.0080         | 0.0084  | 0.0082  | 0.0086         | 0.0077  | 0.0069  |
|          | 2-Ethylhexyl salicylate          | 11 | 0.0015         | 0.0015  | 0.0020  | 0.0044         | 0.0026  | 0.0046  | 0.0039         | 0.0031  | 0.0043  |
|          | Ethyl furoate                    | 12 | 0.0287         | 0.0325  | 0.0351  | 0.0279         | 0.0311  | 0.0296  | 0.0276         | 0.0276  | 0.0303  |
|          | Ethyl 2-hexenoate                | 13 | 0.0083         | 0.0073  | 0.0092  | 0.0046         | 0.0150  | 0.0112  | 0.0071         | 0.0093  | 0.0103  |
|          | Ethyl phenylacetate              | 20 | 0.0371         | 0.0378  | 0.0438  | 0.0411         | 0.0401  | 0.0395  | 0.0436         | 0.0439  | 0.0411  |
|          | Diethyl succinate                | 21 | 1.0614         | 1.1839  | 1.3920  | 1.2399         | 1.1676  | 1.1957  | 1.1795         | 1.2750  | 1.2654  |
|          | Ethyl 2-methylbutyrate           | 23 | 0.0294         | 0.0316  | 0.0342  | 0.0359         | 0.0391  | 0.0384  | 0.0372         | 0.0365  | 0.0365  |
|          | Ethyl isovalerate                | 24 | 0.0737         | 0.0767  | 0.0830  | 0.0757         | 0.0828  | 0.0795  | 0.0838         | 0.0826  | 0.0768  |
|          | Ethyl butanoate                  | 25 | 0.2898         | 0.3166  | 0.3314  | 0.2994         | 0.3224  | 0.3113  | 0.3120         | 0.3154  | 0.2938  |
|          | Ethyl decanoate                  | 26 | 1.4188         | 0.9067  | 1.1562  | 1.5754         | 1.0731  | 0.8948  | 1.4820         | 0.9558  | 1.1504  |
|          | Ethyl 9-decenoate                | 30 | 0.1889         | 0.1237  | 0.1548  | 0.2252         | 0.1677  | 0.1445  | 0.2115         | 0.1419  | 0.1587  |
|          | Ethyl heptanoate                 | 34 | 0.0178         | 0.0172  | 0.0176  | 0.0194         | 0.0213  | 0.0179  | 0.0175         | 0.0172  | 0.0160  |
|          | Isobutyl hexanoate               | 36 | 0.0030         | 0.0030  | 0.0042  | 0.0025         | 0.0031  | 0.0027  | 0.0018         | 0.0029  | 0.0030  |
|          | Ethyl hexanoate                  | 37 | 4.8333         | 5.1785  | 5.8339  | 4.7797         | 5.0253  | 4.8930  | 5.1003         | 5.0953  | 4.6452  |
|          | Methyl hexanoate                 | 38 | 0.0047         | 0.0034  | 0.0000  | 0.0017         | 0.0043  | 0.0039  | 0.0041         | 0.0022  | 0.0036  |
|          | Isopentyl hexanoate              | 39 | 0.0469         | 0.0443  | 0.0560  | 0.0473         | 0.0427  | 0.0385  | 0.0502         | 0.0394  | 0.0421  |
|          | Isoamyl octanoate                | 44 | 0.0315         | 0.0256  | 0.0266  | 0.0339         | 0.0252  | 0.0246  | 0.0414         | 0.0343  | 0.0333  |
|          | Ethyl octanoate                  | 45 | 14.0262        | 13.1191 | 14.9477 | 14.5616        | 12.7034 | 11.9241 | 14.7326        | 12.1270 | 12.7288 |
|          | Diethyl glutarate                | 46 | 0.0083         | 0.0082  | 0.0105  | 0.0099         | 0.0078  | 0.0079  | 0.0083         | 0.0089  | 0.0111  |
|          | Ethyl 2-hydroxy-4-methylvalerate | 47 | 0.01000        | 0.0130  | 0.0127  | 0.0129         | 0.0123  | 0.0110  | 0.0108         | 0.0120  | 0.0107  |
|          | Ethyl valerate                   | 48 | 0.0014         | 0.0033  | 0.0031  | 0.0025         | 0.0048  | 0.0033  | 0.0017         | 0.0028  | 0.0023  |
|          | Ethyl lactate                    | 50 | 0.0189         | 0.0325  | 0.0279  | 0.0282         | 0.0309  | 0.0303  | 0.0191         | 0.0183  | 0.0143  |
|          | Ethyl isobutyrate                | 51 | 0.0238         | 0.0235  | 0.0375  | 0.0364         | 0.0378  | 0.0332  | 0.0328         | 0.0398  | 0.0365  |
|          | Isoamyl acetate                  | 2  | 0.3701         | 0.3525  | 0.3009  | 0.3044         | 0.3262  | 0.3299  | 0.3803         | 0.3512  | 0.3241  |
|          | Phenethyl acetate                | 17 | 0.1191         | 0.1032  | 0.1543  | 0.1166         | 0.0946  | 0.1045  | 0.1389         | 0.1290  | 0.1254  |
|          | Hexyl acetate                    | 18 | 0.0248         | 0.0243  | 0.0378  | 0.0201         | 0.0208  | 0.0213  | 0.0255         | 0.0268  | 0.0204  |
|          | Ethyl acetate                    | 31 | 0.4118         | 0.4197  | 0.4149  | 0.4085         | 0.4414  | 0.4147  | 0.4482         | 0.4422  | 0.4149  |
| Ether    | 3-Ethoxypropanol                 | 9  | 0.0033         | 0.0039  | 0.0000  | 0.0034         | 0.0043  | 0.0041  | 0.0026         | 0.0039  | 0.0036  |
| H        | Styrene                          | 53 | 0.0566         | 0.0615  | 0.0778  | 0.0638         | 0.0510  | 0.0516  | 0.0666         | 0.0538  | 0.0586  |
| C13-NP   | $\beta$ -Damascenone             | 52 | 0.0168         | 0.0397  | 0.0191  | 0.0173         | 0.0211  | 0.0159  | 0.0111         | 0.0132  | 0.0405  |
| Phenol   | Hexyl salicylate                 | 41 | 0.0014         | 0.0012  | 0.0022  | 0.0031         | 0.0018  | 0.0020  | 0.0026         | 0.0018  | 0.0031  |
| Sulfide  | Dimethyl sulfide                 | 27 | 0.0010         | 0.0011  | 0.0009  | 0.0020         | 0.0010  | 0.0014  | 0.0008         | 0.0014  | 0.0014  |

|      |                     |    |        |        |         |        |        |        |        |        |        |
|------|---------------------|----|--------|--------|---------|--------|--------|--------|--------|--------|--------|
| T    | Geranylacetone      | 33 | 0.0173 | 0.0176 | 0.0160  | 0.0215 | 0.0204 | 0.0299 | 0.0284 | 0.0357 | 0.0199 |
|      | $\alpha$ -Terpineol | 54 | 0.0044 | 0.0075 | 0.0046  | 0.0066 | 0.0050 | 0.0053 | 0.0055 | 0.0047 | 0.0044 |
| EtOH | Ethanol             | 29 | 7.4940 | 8.1692 | 10.5290 | 8.2099 | 8.3423 | 7.9751 | 7.9963 | 8.5473 | 8.0469 |

ID: compounds identification; B: bottle; H: hydrocarbon; C13-NP: C13-norisoprenoid; T: terpenoid; EtOH: ethanol

**Table S3.** Normalised areas of the volatile compounds (area of the compound/area of the internal standard) for the lyre training system in the summer vintage of 2017 in Caldas – MG (Brazil) in replicate bottles and vinifications.

| Lyre 2017 |                                  |    | Vinification 1 |         |         | Vinification 2 |         |         | Vinification 3 |         |         |
|-----------|----------------------------------|----|----------------|---------|---------|----------------|---------|---------|----------------|---------|---------|
| Class     | Compound                         | ID | B1             | B2      | B3      | B1             | B2      | B3      | B1             | B2      | B3      |
| Acids     | Acetic acid                      | 16 | 0.0548         | 0.0388  | 0.0301  | 0.0134         | 0.0261  | 0.0214  | 0.0093         | 0.0162  | 0.0193  |
|           | Butanoic acid                    | 22 | 0.0157         | 0.0043  | 0.0051  | 0.0067         | 0.0096  | 0.0069  | 0.0062         | 0.0085  | 0.0100  |
|           | Dodecanoic acid                  | 28 | 0.0000         | 0.0057  | 0.0045  | 0.0060         | 0.0064  | 0.0049  | 0.0079         | 0.0030  | 0.0036  |
|           | Hexanoic acid                    | 35 | 0.6816         | 0.5050  | 0.4042  | 0.5348         | 0.5151  | 0.4226  | 0.4897         | 0.3906  | 0.0375  |
|           | Decanoic acid                    | 40 | 0.4295         | 0.3415  | 0.3363  | 0.5339         | 0.4369  | 0.3799  | 0.6098         | 0.4045  | 0.3813  |
|           | Nonanoic acid                    | 42 | 0.0065         | 0.0000  | 0.0000  | 0.0113         | 0.0114  | 0.0054  | 0.0410         | 0.0081  | 0.0084  |
|           | Octanoic acid                    | 43 | 2.7215         | 2.2846  | 1.9343  | 2.3202         | 2.4885  | 2.0297  | 2.4450         | 1.7760  | 1.7697  |
| Alcohols  | 3-Methyl-1-butanol               | 1  | 1.9097         | 2.3016  | 1.6411  | 1.7662         | 1.7258  | 1.7115  | 1.9305         | 1.9168  | 1.9759  |
|           | Decanol                          | 3  | 0.0532         | 0.0000  | 0.0000  | 0.0386         | 0.0423  | 0.0388  | 0.0198         | 0.0121  | 0.0151  |
|           | Hexanol                          | 4  | 0.1607         | 0.1314  | 0.1118  | 0.1427         | 0.1158  | 0.1128  | 0.1311         | 0.1214  | 0.1244  |
|           | Nonanol                          | 5  | 0.0156         | 0.0000  | 0.0104  | 0.0099         | 0.0125  | 0.0060  | 0.0103         | 0.0167  | 0.0118  |
|           | Octanol                          | 6  | 0.0487         | 0.0357  | 0.0307  | 0.0461         | 0.0331  | 0.0341  | 0.0402         | 0.0380  | 0.0350  |
|           | Propanol                         | 7  | 0.0334         | 0.0115  | 0.0285  | 0.0294         | 0.0292  | 0.0296  | 0.0254         | 0.0273  | 0.0294  |
|           | 2-Methyl-1-propanol              | 8  | 0.0814         | 0.0000  | 0.0808  | 0.0797         | 0.0483  | 0.0681  | 0.0758         | 0.0821  | 0.0841  |
|           | 3-Hexen-1-ol, (E)-               | 14 | 0.0016         | 0.0000  | 0.0000  | 0.0010         | 0.0008  | 0.0012  | 0.0010         | 0.0010  | 0.0012  |
| Aldehyde  | Phenylethyl alcohol              | 49 | 2.4078         | 2.0420  | 1.6873  | 2.3480         | 2.4085  | 1.9734  | 2.3982         | 1.8482  | 1.9093  |
|           | Acetaldehyde                     | 15 | 0.0134         | 0.0042  | 0.0061  | 0.0095         | 0.0081  | 0.0070  | 0.0074         | 0.0081  | 0.0092  |
|           | Benzaldehyde                     | 19 | 0.0066         | 0.0038  | 0.0060  | 0.0083         | 0.0079  | 0.0044  | 0.0073         | 0.0053  | 0.0045  |
| Esters    | Furfural                         | 32 | 0.0894         | 0.0733  | 0.0642  | 0.0782         | 0.0649  | 0.0613  | 0.0755         | 0.0598  | 0.0612  |
|           | Ethyl (E)-crotonate              | 10 | 0.0066         | 0.0040  | 0.0044  | 0.0055         | 0.0040  | 0.0039  | 0.0053         | 0.0037  | 0.0038  |
|           | 2-Ethylhexyl salicylate          | 11 | 0.0201         | 0.0030  | 0.0000  | 0.1536         | 0.0022  | 0.0029  | 0.0643         | 0.0033  | 0.0043  |
|           | Ethyl furoate                    | 12 | 0.0474         | 0.0511  | 0.0326  | 0.0481         | 0.0327  | 0.0354  | 0.0434         | 0.0319  | 0.0330  |
|           | Ethyl 2-hexenoate                | 13 | 0.0076         | 0.0051  | 0.0047  | 0.0079         | 0.0000  | 0.0000  | 0.0059         | 0.0053  | 0.0037  |
|           | Ethyl phenylacetate              | 20 | 0.0543         | 0.0470  | 0.0490  | 0.0598         | 0.0557  | 0.0555  | 0.0609         | 0.0505  | 0.0493  |
|           | Diethyl succinate                | 21 | 0.3078         | 2.7776  | 2.4335  | 2.7959         | 2.9450  | 2.6634  | 2.8923         | 2.5416  | 2.6625  |
|           | Ethyl 2-methylbutyrate           | 23 | 0.0450         | 0.0361  | 0.0341  | 0.0423         | 0.0410  | 0.0418  | 0.0438         | 0.0488  | 0.0510  |
|           | Ethyl isovalerate                | 24 | 0.0785         | 0.0670  | 0.0577  | 0.0661         | 0.0627  | 0.0637  | 0.0663         | 0.0688  | 0.0743  |
|           | Ethyl butanoate                  | 25 | 0.2873         | 0.2272  | 0.2095  | 0.2545         | 0.2205  | 0.2165  | 0.2321         | 0.2165  | 0.2294  |
|           | Ethyl decanoate                  | 26 | 2.6588         | 1.2146  | 1.1478  | 1.6091         | 1.0520  | 1.2606  | 1.3193         | 0.7463  | 1.0461  |
|           | Ethyl 9-decenoate                | 30 | 0.9993         | 0.5423  | 0.6011  | 0.7118         | 0.5303  | 0.6839  | 0.6223         | 0.3951  | 0.5185  |
|           | Ethyl heptanoate                 | 34 | 0.0413         | 0.0196  | 0.0239  | 0.0318         | 0.0339  | 0.0299  | 0.0262         | 0.0277  | 0.0276  |
|           | Isobutyl hexanoate               | 36 | 0.0043         | 0.0000  | 0.0026  | 0.0018         | 0.0025  | 0.0029  | 0.0021         | 0.0029  | 0.0025  |
|           | Ethyl hexanoate                  | 37 | 7.0331         | 5.2088  | 4.3755  | 5.8505         | 4.5438  | 4.4664  | 4.7390         | 4.3576  | 4.4428  |
|           | Methyl hexanoate                 | 38 | 0.0055         | 0.0000  | 0.0029  | 0.0039         | 0.0000  | 0.0011  | 0.0032         | 0.0030  | 0.0031  |
|           | Isopentyl hexanoate              | 39 | 0.0641         | 0.0536  | 0.0364  | 0.0401         | 0.0354  | 0.0345  | 0.0388         | 0.0313  | 0.0362  |
|           | Isoamyl octanoate                | 44 | 0.0860         | 0.0543  | 0.0302  | 0.0449         | 0.0355  | 0.0239  | 0.0000         | 0.0312  | 0.0295  |
|           | Ethyl octanoate                  | 45 | 23.1113        | 13.7033 | 13.4469 | 16.9651        | 12.3022 | 13.9949 | 14.6017        | 10.9568 | 12.4539 |
|           | Diethyl glutarate                | 46 | 0.0143         | 0.0110  | 0.0000  | 0.0129         | 0.0146  | 0.0115  | 0.0131         | 0.0108  | 0.0106  |
|           | Ethyl 2-hydroxy-4-methylvalerate | 47 | 0.0072         | 0.0116  | 0.0091  | 0.0092         | 0.0097  | 0.0073  | 0.0088         | 0.0105  | 0.0094  |
|           | Ethyl valerate                   | 48 | 0.0063         | 0.0000  | 0.0025  | 0.0022         | 0.0027  | 0.0033  | 0.0018         | 0.0036  | 0.0050  |
|           | Ethyl lactate                    | 50 | 0.0252         | 0.0240  | 0.0182  | 0.0228         | 0.0281  | 0.0252  | 0.0234         | 0.0208  | 0.0239  |
|           | Ethyl isobutyrate                | 51 | 0.0406         | 0.0235  | 0.0186  | 0.0367         | 0.0241  | 0.0291  | 0.0310         | 0.0289  | 0.0384  |
|           | Isoamyl acetate                  | 2  | 0.2160         | 0.0895  | 0.1273  | 0.1951         | 0.1225  | 0.1059  | 0.1610         | 0.1244  | 0.1122  |
|           | Phenethyl acetate                | 17 | 0.0778         | 0.0700  | 0.0597  | 0.0861         | 0.0735  | 0.0638  | 0.0842         | 0.0588  | 0.0513  |
|           | Hexyl acetate                    | 18 | 0.0229         | 0.0000  | 0.0092  | 0.0256         | 0.0150  | 0.0094  | 0.0191         | 0.0103  | 0.0096  |

|                |                      |    |         |         |        |         |        |        |        |        |        |
|----------------|----------------------|----|---------|---------|--------|---------|--------|--------|--------|--------|--------|
|                | Ethyl acetate        | 31 | 0.5567  | 0.4123  | 0.4337 | 0.5057  | 0.4088 | 0.4177 | 0.4194 | 0.4018 | 0.4064 |
| <b>Ether</b>   | 3-Ethoxypropanol     | 9  | 0.0065  | 0.0000  | 0.0017 | 0.0057  | 0.0046 | 0.0025 | 0.0016 | 0.0024 | 0.0030 |
| <b>H</b>       | Styrene              | 53 | 0.0429  | 0.0274  | 0.0236 | 0.0414  | 0.0250 | 0.0358 | 0.0307 | 0.0215 | 0.0213 |
| <b>C13-NP</b>  | $\beta$ -Damascenone | 52 | 0.0190  | 0.0117  | 0.0101 | 0.0115  | 0.0098 | 0.0104 | 0.0118 | 0.0105 | 0.0190 |
| <b>Phenol</b>  | Hexyl salicylate     | 41 | 0.0000  | 0.0026  | 0.0017 | 0.0000  | 0.0029 | 0.0027 | 0.0000 | 0.0016 | 0.0024 |
| <b>Sulfide</b> | Dimethyl sulfide     | 27 | 0.0094  | 0.0022  | 0.0014 | 0.0058  | 0.0013 | 0.0014 | 0.0032 | 0.0012 | 0.0010 |
| <b>T</b>       | Geranylacetone       | 33 | 0.0133  | 0.0205  | 0.0615 | 0.0000  | 0.0167 | 0.0550 | 0.0238 | 0.0585 | 0.0005 |
|                | $\alpha$ -Terpineol  | 54 | 0.0000  | 0.0203  | 0.0039 | 0.0000  | 0.0071 | 0.0054 | 0.0000 | 0.0054 | 0.0040 |
| <b>EtOH</b>    | Ethanol              | 29 | 11.8132 | 10.4770 | 8.7179 | 10.1860 | 9.6305 | 9.4350 | 8.9473 | 8.9854 | 9.3999 |

ID: compounds identification; B: bottle; H: hydrocarbon; C13-NP: C13-norisoprenoid; T: terpenoid; EtOH: ethanol

**Table S4.** Normalised areas of the volatile compounds (area of the compound/area of the internal standard) for the lyre training system in the summer vintage of 2018 in Caldas – MG (Brazil) in replicate bottles and vinifications.

| Lyre 2018       |                         |    | Vinification 1 |         |         | Vinification 2 |         |         | Vinification 3 |         |         |
|-----------------|-------------------------|----|----------------|---------|---------|----------------|---------|---------|----------------|---------|---------|
| Class           | Compound                | ID | B1             | B2      | B3      | B1             | B2      | B3      | B1             | B2      | B3      |
| <b>Acids</b>    | Acetic acid             | 16 | 0.0302         | 0.0237  | 0.0220  | 0.0197         | 0.0322  | 0.0255  | 0.0278         | 0.0292  | 0.0294  |
|                 | Butanoic acid           | 22 | 0.0088         | 0.0114  | 0.0126  | 0.0084         | 0.0112  | 0.0135  | 0.0149         | 0.0124  | 0.0098  |
|                 | Dodecanoic acid         | 28 | 0.0164         | 0.0806  | 0.0306  | 0.0149         | 0.0201  | 0.0202  | 0.0162         | 0.0156  | 0.0156  |
|                 | Hexanoic acid           | 35 | 0.5968         | 0.5785  | 0.6400  | 0.5039         | 0.6473  | 0.5722  | 0.5996         | 0.5138  | 0.5908  |
|                 | Decanoic acid           | 40 | 0.6327         | 0.7265  | 0.8602  | 0.6473         | 0.7654  | 0.6855  | 0.5817         | 0.3724  | 0.3020  |
|                 | Nonanoic acid           | 42 | 0.0970         | 0.1050  | 0.0771  | 0.0316         | 0.0362  | 0.0440  | 0.0580         | 0.0514  | 0.0625  |
|                 | Octanoic acid           | 43 | 2.6257         | 2.8048  | 3.2188  | 2.4337         | 3.0250  | 2.7724  | 3.1309         | 2.1234  | 2.6287  |
| <b>Alcohols</b> | 3-Methyl-1-butanol      | 1  | 1.7367         | 1.6197  | 1.8232  | 1.5976         | 2.3158  | 1.8218  | 1.7150         | 1.7710  | 1.6918  |
|                 | Decanol                 | 3  | 0.0398         | 0.0504  | 0.0562  | 0.0367         | 0.0462  | 0.0454  | 0.0351         | 0.0299  | 0.0419  |
|                 | Hexanol                 | 4  | 0.1572         | 0.1623  | 0.1617  | 0.1463         | 0.1695  | 0.1600  | 0.1471         | 0.1477  | 0.1522  |
|                 | Nonanol                 | 5  | 0.0100         | 0.0126  | 0.0123  | 0.0090         | 0.0135  | 0.0105  | 0.0094         | 0.0052  | 0.0049  |
|                 | Octanol                 | 6  | 0.0384         | 0.0425  | 0.0354  | 0.0297         | 0.0323  | 0.0352  | 0.0279         | 0.0304  | 0.0335  |
|                 | Propanol                | 7  | 0.0261         | 0.0276  | 0.0306  | 0.0277         | 0.0404  | 0.0342  | 0.0286         | 0.0275  | 0.0242  |
|                 | 2-Methyl-1-propanol     | 8  | 0.0624         | 0.0703  | 0.0630  | 0.0634         | 0.0805  | 0.0697  | 0.0614         | 0.0585  | 0.0594  |
|                 | 3-Hexen-1-ol, (E)-      | 14 | 0.0023         | 0.0028  | 0.0027  | 0.0026         | 0.0034  | 0.0035  | 0.0025         | 0.0026  | 0.0038  |
|                 | Phenylethyl alcohol     | 49 | 1.5097         | 1.3878  | 1.8036  | 1.2154         | 1.5987  | 1.4191  | 1.5523         | 1.1744  | 1.4018  |
| <b>Aldehyde</b> | Acetaldehyde            | 15 | 0.0057         | 0.0045  | 0.0057  | 0.0048         | 0.0066  | 0.0040  | 0.0042         | 0.0041  | 0.0056  |
|                 | Benzaldehyde            | 19 | 0.0058         | 0.0065  | 0.0075  | 0.0061         | 0.0069  | 0.0067  | 0.0081         | 0.0056  | 0.0094  |
|                 | Furfural                | 32 | 0.0213         | 0.0239  | 0.0297  | 0.0211         | 0.0279  | 0.0270  | 0.0229         | 0.0572  | 0.0366  |
| <b>Esters</b>   | Ethyl (E)-crotonate     | 10 | 0.0093         | 0.0103  | 0.0093  | 0.0085         | 0.0103  | 0.0107  | 0.0083         | 0.0093  | 0.0089  |
|                 | 2-Ethylhexyl salicylate | 11 | 0.0034         | 0.0026  | 0.0032  | 0.0022         | 0.0025  | 0.0027  | 0.0022         | 0.0025  | 0.0014  |
|                 | Ethyl furoate           | 12 | 0.0306         | 0.0324  | 0.0336  | 0.0284         | 0.0341  | 0.0336  | 0.0296         | 0.0288  | 0.0311  |
|                 | Ethyl 2-hexenoate       | 13 | 0.0113         | 0.0097  | 0.0088  | 0.0127         | 0.0149  | 0.0183  | 0.0107         | 0.0135  | 0.0168  |
|                 | Ethyl phenylacetate     | 20 | 0.0465         | 0.0520  | 0.0548  | 0.0412         | 0.0518  | 0.0497  | 0.0544         | 0.0453  | 0.0496  |
|                 | Diethyl succinate       | 21 | 1.3245         | 1.3299  | 1.4733  | 1.1092         | 1.3741  | 1.2620  | 1.3208         | 1.1039  | 1.2780  |
|                 | Ethyl 2-methylbutyrate  | 23 | 0.0275         | 0.0267  | 0.0262  | 0.0234         | 0.0306  | 0.0280  | 0.0252         | 0.0263  | 0.0272  |
|                 | Ethyl isovalerate       | 24 | 0.0672         | 0.0626  | 0.0638  | 0.0576         | 0.0744  | 0.0698  | 0.0589         | 0.0618  | 0.0628  |
|                 | Ethyl butanoate         | 25 | 0.3190         | 0.3026  | 0.3178  | 0.2996         | 0.3758  | 0.3443  | 0.2939         | 0.3129  | 0.3081  |
|                 | Ethyl decanoate         | 26 | 1.0698         | 0.8415  | 0.9756  | 1.1286         | 1.6620  | 1.0085  | 1.5858         | 0.9176  | 1.0582  |
|                 | Ethyl 9-decenoate       | 30 | 0.1649         | 0.1321  | 0.1318  | 0.1520         | 0.2142  | 0.1680  | 0.2622         | 0.1907  | 0.1946  |
|                 | Ethyl heptanoate        | 34 | 0.0167         | 0.0167  | 0.0171  | 0.0137         | 0.0180  | 0.0167  | 0.0142         | 0.0160  | 0.0339  |
|                 | Isobutyl hexanoate      | 36 | 0.0018         | 0.0015  | 0.0022  | 0.0015         | 0.0030  | 0.0021  | 0.0019         | 0.0020  | 0.0032  |
|                 | Ethyl hexanoate         | 37 | 5.3644         | 5.2096  | 5.1249  | 5.0459         | 6.0188  | 5.7996  | 4.9442         | 5.2395  | 5.3121  |
|                 | Methyl hexanoate        | 38 | 0.0036         | 0.0044  | 0.0026  | 0.0042         | 0.0047  | 0.0045  | 0.0033         | 0.0032  | 0.0000  |
|                 | Isopentyl hexanoate     | 39 | 0.0321         | 0.0343  | 0.0271  | 0.0332         | 0.0536  | 0.0384  | 0.0407         | 0.0080  | 0.0533  |
|                 | Isoamyl octanoate       | 44 | 0.0258         | 0.0232  | 0.0325  | 0.0252         | 0.0476  | 0.0304  | 0.0373         | 0.0175  | 0.0202  |
|                 | Ethyl octanoate         | 45 | 13.4723        | 12.0671 | 12.2883 | 12.8809        | 16.3360 | 13.9462 | 14.7012        | 13.9100 | 13.9177 |
|                 | Diethyl glutarate       | 46 | 0.0090         | 0.0110  | 0.0122  | 0.0089         | 0.0116  | 0.0095  | 0.0123         | 0.0072  | 0.0095  |

|                |                                  |    |        |        |        |        |         |        |        |        |        |
|----------------|----------------------------------|----|--------|--------|--------|--------|---------|--------|--------|--------|--------|
|                | Ethyl 2-hydroxy-4-methylvalerate | 47 | 0.0096 | 0.0107 | 0.0121 | 0.0069 | 0.0089  | 0.0095 | 0.0094 | 0.0095 | 0.0058 |
|                | Ethyl valerate                   | 48 | 0.0053 | 0.0011 | 0.0026 | 0.0028 | 0.0041  | 0.0040 | 0.0021 | 0.0041 | 0.0024 |
|                | Ethyl lactate                    | 50 | 0.0220 | 0.0209 | 0.0235 | 0.0161 | 0.0237  | 0.0158 | 0.0214 | 0.0189 | 0.0170 |
|                | Ethyl isobutyrate                | 51 | 0.0323 | 0.0287 | 0.0250 | 0.0275 | 0.0366  | 0.0362 | 0.0322 | 0.0303 | 0.0304 |
|                | Isoamyl acetate                  | 2  | 0.3578 | 0.3464 | 0.3377 | 0.3218 | 0.3745  | 0.3688 | 0.3068 | 0.3146 | 0.2392 |
|                | Phenethyl acetate                | 17 | 0.1154 | 0.1227 | 0.1337 | 0.0977 | 0.1255  | 0.1190 | 0.1278 | 0.1006 | 0.1122 |
|                | Hexyl acetate                    | 18 | 0.0340 | 0.0338 | 0.0319 | 0.0301 | 0.0343  | 0.0362 | 0.0322 | 0.0329 | 0.0376 |
|                | Ethyl acetate                    | 31 | 0.4038 | 0.3965 | 0.4152 | 0.3556 | 0.4550  | 0.3976 | 0.3661 | 0.3817 | 0.3518 |
| <b>Ether</b>   | 3-Ethoxypropanol                 | 9  | 0.0028 | 0.0030 | 0.0035 | 0.0027 | 0.0050  | 0.0030 | 0.0032 | 0.0029 | 0.0032 |
| <b>H</b>       | Styrene                          | 53 | 0.0343 | 0.0309 | 0.0352 | 0.0319 | 0.0426  | 0.0393 | 0.0320 | 0.0355 | 0.0397 |
| <b>C13-NP</b>  | $\beta$ -Damascenone             | 52 | 0.0163 | 0.0110 | 0.0112 | 0.0075 | 0.0101  | 0.0075 | 0.0111 | 0.0079 | 0.0088 |
| <b>Phenol</b>  | Hexyl salicylate                 | 41 | 0.0028 | 0.0014 | 0.0015 | 0.0015 | 0.0018  | 0.0019 | 0.0019 | 0.0015 | 0.0021 |
| <b>Sulfide</b> | Dimethyl sulfide                 | 27 | 0.0011 | 0.0014 | 0.0009 | 0.0010 | 0.0013  | 0.0021 | 0.0013 | 0.0016 | 0.0015 |
| <b>T</b>       | Geranylacetone                   | 33 | 0.0043 | 0.0016 | 0.0034 | 0.0037 | 0.0038  | 0.0040 | 0.0057 | 0.0128 | 0.0195 |
|                | $\alpha$ -Terpineol              | 54 | 0.0072 | 0.0072 | 0.0091 | 0.0051 | 0.0079  | 0.0070 | 0.0082 | 0.0080 | 0.0094 |
| <b>EtOH</b>    | Ethanol                          | 29 | 7.5826 | 7.4958 | 8.8089 | 7.3228 | 10.2925 | 8.3781 | 7.4779 | 7.5605 | 7.6726 |

ID: compounds identification; B: bottle; H: hydrocarbon; C13-NP: C13-norisoprenoid; T: terpenoid; EtOH: ethanol
